# Supplementary material for: Characteristics of oral methicillin-resistant Staphylococcus epidermidis isolated from dental plaque
Source: PubMed Central journal article supplement (PMC7210960; doi:10.1038/s41368-020-0079-5), 2020-05-09
Supplement: 41368_2020_79_MOESM4_ESM.pdf [file 41368_2020_79_MOESM4_ESM.pdf]

Table S2. Detailed list of  $\beta$ -lactam antibiotic resistant bacteria in dental plaque biofilm

| Isolate reference | Sampling Date | Strain Name                           | Gram Stain | BLAST Max | BLAST Query cover | Ident | Source              | Incubation condition | Batch |
|-------------------|---------------|---------------------------------------|------------|-----------|-------------------|-------|---------------------|----------------------|-------|
| DR41-1            | 20171202      | <i>Abiotrophia defectiva</i>          | Pos        | 1354      | 96%               | 95%   | Human dental plaque | Aerobic              | 1     |
| DR39-1            | 20171202      | <i>Actinomyces odontolyticus</i>      | Pos        | 2495      | 100%              | 99%   | Human dental plaque | Aerobic              | 1     |
| DR40-2            | 20171202      | <i>Actinomyces odontolyticus</i>      | Pos        | 1724      | 99%               | 99%   | Human dental plaque | Aerobic              | 1     |
| DR51              | 20171202      | <i>Actinomyces odontolyticus</i>      | Pos        | 2484      | 100%              | 99%   | Human dental plaque | Aerobic              | 1     |
| DR106-3           | 20171218      | <i>Agromyces mediolanus</i>           | Neg        | 2505      | 100%              | 99%   | Human dental plaque | Aerobic              | 1     |
| DR59-1            | 20171210      | <i>Arthrobacter woltwensis</i>        | Pos        | 2571      | 99%               | 99%   | Human dental plaque | Aerobic              | 1     |
| DR59-2            | 20171210      | <i>Arthrobacter woltwensis</i>        | Pos        | 2579      | 99%               | 99%   | Human dental plaque | Aerobic              | 1     |
| DR-2              | 20171101      | <i>Burkholderia cenocepacia</i>       | Neg        | 1720      | 98%               | 99%   | Human dental plaque | Aerobic              | 1     |
| DR-7              | 20171101      | <i>Burkholderia cenocepacia</i>       | Neg        | 1722      | 99%               | 99%   | Human dental plaque | Aerobic              | 1     |
| DR-8              | 20171101      | <i>Burkholderia cepacia</i>           | Neg        | 2468      | 100%              | 99%   | Human dental plaque | Aerobic              | 1     |
| DR89-1            | 20171213      | <i>Candida albicans</i>               | N          | 1733      | 98%               | 100%  | Human dental plaque | Aerobic              | 1     |
| DR87-2            | 20171213      | <i>Candida inconspicua</i>            | N          | 2507      | 100%              | 100%  | Human dental plaque | Aerobic              | 1     |
| DR-18             | 20171115      | <i>Candida norvegensis</i>            | N          | 1724      | 98%               | 99%   | Human dental plaque | Aerobic              | 1     |
| DR-17             | 20171115      | <i>Candida parapsilosis</i>           | N          | 1714      | 100%              | 99%   | Human dental plaque | Aerobic              | 1     |
| DR-16             | 20171115      | <i>Candida parapsilosis</i>           | Neg        |           | 99%               | 99%   | Human dental plaque | Aerobic              | 1     |
| DR53-1            | 20171202      | <i>Chryseobacterium daecheongense</i> | Neg        | 2449      | 99%               | 99%   | Human dental plaque | Aerobic              | 1     |
| DR56-1            | 20171202      | <i>Chryseobacterium daecheongense</i> | Neg        | 2557      | 100%              | 100%  | Human dental plaque | Aerobic              | 1     |
| DR56-2            | 20171202      | <i>Chryseobacterium daecheongense</i> | Neg        | 2534      | 99%               | 99%   | Human dental plaque | Aerobic              | 1     |
| DR38-1            | 20171202      | <i>Chryseobacterium gleum</i>         | Neg        | 2486      | 100%              | 99%   | Human dental plaque | Aerobic              | 1     |
| DR67-1            | 20171210      | <i>Chryseobacterium gleum</i>         | Neg        | 1219      | 93%               | 93%   | Human dental plaque | Aerobic              | 1     |
| DR67-3            | 20171210      | <i>Chryseobacterium gleum</i>         | Neg        | 835       | 98%               | 84%   | Human dental plaque | Aerobic              | 1     |
| DR79-2            | 20171210      | <i>Chryseobacterium gleum</i>         | Neg        | 2473      | 100%              | 99%   | Human dental plaque | Aerobic              | 1     |
| DR79-3            | 20171210      | <i>Chryseobacterium gleum</i>         | Neg        | 2492      | 100%              | 99%   | Human dental plaque | Aerobic              | 1     |
| DR-30             | 20171115      | <i>Chryseobacterium indologenes</i>   | Neg        | 1722      | 98%               | 100%  | Human dental plaque | Aerobic              | 1     |
| DR-31             | 20171115      | <i>Chryseobacterium indologenes</i>   | Neg        | 1722      | 98%               | 100%  | Human dental plaque | Aerobic              | 1     |
| DR95-1            | 20171213      | <i>Chryseobacterium indologenes</i>   | Neg        | 2479      | 100%              | 100%  | Human dental plaque | Aerobic              | 1     |
| DR95-3            | 20171213      | <i>Chryseobacterium indologenes</i>   | Neg        | 1400      | 97%               | 97%   | Human dental plaque | Aerobic              | 1     |
| DR98-1            | 20171218      | <i>Chryseobacterium indologenes</i>   | Neg        | 2479      | 100%              | 100%  | Human dental plaque | Aerobic              | 1     |
| DR103             | 20171218      | <i>Chryseobacterium indologenes</i>   | Neg        | 1736      | 99%               | 99%   | Human dental plaque | Aerobic              | 1     |
| DR107-1           | 20171218      | <i>Chryseobacterium indologenes</i>   | Neg        | 1735      | 99%               | 99%   | Human dental plaque | Aerobic              | 1     |
| DR107-2           | 20171218      | <i>Chryseobacterium indologenes</i>   | Neg        | 1722      | 99%               | 99%   | Human dental plaque | Aerobic              | 1     |
| 44-1              | 20181210      | <i>Chryseobacterium indologenes</i>   | Neg        | 1722      | 99                | 99    | Human dental plaque | Aerobic              | 2     |
| DR-24             | 20171115      | <i>Chryseobacterium indologenes</i>   | Neg        | 2356      | 95%               | 90%   | Human dental plaque | Aerobic              | 1     |
| DR45-1            | 20171202      | <i>Corynebacterium argentoratense</i> | Pos        | 2464      | 100%              | 99%   | Human dental plaque | Aerobic              | 1     |
| DR45-2            | 20171202      | <i>Corynebacterium argentoratense</i> | Pos        | 2492      | 99%               | 99%   | Human dental plaque | Aerobic              | 1     |
| DR46-1            | 20171202      | <i>Corynebacterium argentoratense</i> | Pos        | 1727      | 99%               | 99%   | Human dental plaque | Aerobic              | 1     |
| DR69-1            | 20171210      | <i>Corynebacterium argentoratense</i> | Pos        | 2481      | 99%               | 99%   | Human dental plaque | Aerobic              | 1     |
| DR69-2            | 20171210      | <i>Corynebacterium argentoratense</i> | Pos        | 2479      | 100%              | 99%   | Human dental plaque | Aerobic              | 1     |
| DR70-1            | 20171210      | <i>Corynebacterium argentoratense</i> | Pos        | 2457      | 100%              | 99%   | Human dental plaque | Aerobic              | 1     |
| DR70-2            | 20171210      | <i>Corynebacterium argentoratense</i> | Pos        | 2444      | 100%              | 99%   | Human dental plaque | Aerobic              | 1     |
| DR78-1            | 20171210      | <i>Corynebacterium argentoratense</i> | Pos        | 2470      | 99%               | 99%   | Human dental plaque | Aerobic              | 1     |
| DR78-2            | 20171210      | <i>Corynebacterium argentoratense</i> | Pos        | 2470      | 99%               | 99%   | Human dental plaque | Aerobic              | 1     |
| 51-2              | 20181210      | <i>Corynebacterium argentoratense</i> | Pos        | 1653      | 100               | 98    | Human dental plaque | Aerobic              | 2     |
| 1-2               | 20181210      | <i>Corynebacterium argentoratense</i> | Pos        | 1670      | 98                | 99    | Human dental plaque | Aerobic              | 2     |
| 1-3               | 20181210      | <i>Corynebacterium argentoratense</i> | Pos        | 1642      | 99                | 98    | Human dental plaque | Aerobic              | 2     |
| 51-1              | 20181210      | <i>Corynebacterium argentoratense</i> | Pos        | 1688      | 99                | 99    | Human dental plaque | Aerobic              | 2     |
| 58-1              | 20181210      | <i>Corynebacterium argentoratense</i> | Pos        | 1683      | 99                | 99    | Human dental plaque | Aerobic              | 2     |
| 58-2              | 20181210      | <i>Corynebacterium argentoratense</i> | Pos        | 1727      | 99                | 99    | Human dental plaque | Aerobic              | 2     |
| DR67-5            | 20171210      | <i>Cupriavidus gilardii</i>           | Neg        | 1735      | 99%               | 99%   | Human dental plaque | Aerobic              | 1     |
| 40                | 20181210      | <i>Cupriavidus gilardii</i>           | Neg        | 1731      | 100               | 99    | Human dental plaque | Aerobic              | 2     |
| 7                 | 20181210      | <i>Elizabethkingia anophelis</i>      | Neg        | 1494      | 99                | 99    | Human dental plaque | Aerobic              | 2     |
| 8-3               | 20181210      | <i>Elizabethkingia anophelis</i>      | Neg        | 1694      | 99                | 99    | Human dental plaque | Aerobic              | 2     |
| 11                | 20181210      | <i>Elizabethkingia anophelis</i>      | Neg        | 1690      | 99                | 99    | Human dental plaque | Aerobic              | 2     |
| 14-1              | 20181210      | <i>Elizabethkingia anophelis</i>      | Neg        | 1742      | 100               | 99    | Human dental plaque | Aerobic              | 2     |
| DR-9              | 20171110      | <i>Enterobacter hormaechei</i>        | Neg        | 1727      | 98%               | 100%  | Human dental plaque | Aerobic              | 1     |
| DR-10             | 20171110      | <i>Enterobacter hormaechei</i>        | Neg        | 1705      | 99%               | 99%   | Human dental plaque | Aerobic              | 1     |
| DR-11             | 20171110      | <i>Enterobacter hormaechei</i>        | Neg        | 1709      | 98%               | 99%   | Human dental plaque | Aerobic              | 1     |
| DR74-1            | 20171210      | <i>Escherichia coli</i>               | Neg        | 1426      | 97%               | 97%   | Human dental plaque | Aerobic              | 1     |
| DR100-1           | 20171218      | <i>Escherichia coli</i>               | Neg        | 2514      | 100%              | 100%  | Human dental plaque | Aerobic              | 1     |
| DR52              | 20171202      | <i>Granulicatella adiacens</i>        | Pos        | 1243      | 92%               | 94%   | Human dental plaque | Aerobic              | 1     |
| DR95-2            | 20171213      | <i>Klebsiella pneumoniae subsp</i>    | Neg        | 2492      | 100%              | 99%   | Human dental plaque | Aerobic              | 1     |
| DR40-1            | 20171202      | <i>Lactobacillus casei</i>            | Pos        | 2343      | 100%              | 99%   | Human dental plaque | Aerobic              | 1     |
| DR39-2            | 20171202      | <i>Lactobacillus casei</i>            | Pos        | 1456      | 99%               | 98%   | Human dental plaque | Aerobic              | 1     |
| DR57-1            | 20171202      | <i>Lactobacillus casei</i>            | Pos        | 2591      | 100%              | 99%   | Human dental plaque | Aerobic              | 1     |
| DR71-1            | 20171210      | <i>Lactobacillus casei</i>            | Pos        | 2555      | 100%              | 99%   | Human dental plaque | Aerobic              | 1     |
| DR81-1            | 20171210      | <i>Lactobacillus casei</i>            | Pos        | 2593      | 100%              | 99%   | Human dental plaque | Aerobic              | 1     |
| DR81-2            | 20171210      | <i>Lactobacillus casei</i>            | Pos        | 2628      | 100%              | 99%   | Human dental plaque | Aerobic              | 1     |
| DR100-2           | 20171218      | <i>Lactobacillus casei</i>            | Pos        | 2593      | 100%              | 99%   | Human dental plaque | Aerobic              | 1     |
| DR105-1           | 20171218      | <i>Lactobacillus casei</i>            | Pos        | 2588      | 99%               | 99%   | Human dental plaque | Aerobic              | 1     |
| DR105-2           | 20171218      | <i>Lactobacillus casei</i>            | Pos        | 2601      | 100%              | 99%   | Human dental plaque | Aerobic              | 1     |
| DR105-3           | 20171218      | <i>Lactobacillus casei</i>            | Pos        | 2573      | 100%              | 99%   | Human dental plaque | Aerobic              | 1     |
| DR35-2            | 20171202      | <i>Lactobacillus casei</i>            | Pos        | 1727      | 100%              | 99%   | Human dental plaque | Aerobic              | 1     |
| DR57-2            | 20171202      | <i>Lactobacillus casei/paracasei</i>  | Pos        | 2590      | 100%              | 99%   | Human dental plaque | Aerobic              | 1     |
| DR101-2           | 20171218      | <i>Lactobacillus casei/paracasei</i>  | Pos        | 2584      | 100%              | 99%   | Human dental plaque | Aerobic              | 1     |
| DR48              | 20171202      | <i>Lactobacillus paracasei</i>        | Pos        | 2597      | 100%              | 100%  | Human dental plaque | Aerobic              | 1     |
| D-2               | 20181210      | <i>Lactobacillus reuteri</i>          | Pos        | 1428      | 97                | 96    | Human dental plaque | Aerobic              | 2     |
| DR42-3            | 20171202      | <i>Lactobacillus rhamnosus</i>        | Pos        | 2662      | 99%               | 99%   | Human dental plaque | Aerobic              | 1     |
| DR43-1            | 20171202      | <i>Lactobacillus rhamnosus</i>        | Pos        | 2604      | 100%              | 99%   | Human dental plaque | Aerobic              | 1     |
| DR43-2            | 20171202      | <i>Lactobacillus rhamnosus</i>        | Pos        | 2540      | 100%              | 99%   | Human dental plaque | Aerobic              | 1     |
| DR44-1            | 20171202      | <i>Lactobacillus rhamnosus</i>        | Pos        | 2597      | 100%              | 100%  | Human dental plaque | Aerobic              | 1     |
| DR44-2            | 20171202      | <i>Lactobacillus rhamnosus</i>        | Pos        | 2614      | 100%              | 100%  | Human dental plaque | Aerobic              | 1     |
| DR71-2            | 20171210      | <i>Lactobacillus rhamnosus</i>        | Pos        | 2562      | 100%              | 100%  | Human dental plaque | Aerobic              | 1     |
| DR82-1            | 20171210      | <i>Lactobacillus rhamnosus</i>        | Pos        | 2612      | 100%              | 100%  | Human dental plaque | Aerobic              | 1     |
| DR82-2            | 20171210      | <i>Lactobacillus rhamnosus</i>        | Pos        | 2582      | 100%              | 100%  | Human dental plaque | Aerobic              | 1     |
| DR82-3            | 20171210      | <i>Lactobacillus rhamnosus</i>        | Pos        | 2586      | 100%              | 100%  | Human dental plaque | Aerobic              | 1     |
| DR87-1            | 20171213      | <i>Lactobacillus rhamnosus</i>        | Pos        | 2630      | 100%              | 99%   | Human dental plaque | Aerobic              | 1     |
| DR87-3            | 20171213      | <i>Lactobacillus rhamnosus</i>        | Pos        | 2671      | 99%               | 99%   | Human dental plaque | Aerobic              | 1     |
| DR87-5            | 20171213      | <i>Lactobacillus rhamnosus</i>        | Pos        | 2595      | 100%              | 99%   | Human dental plaque | Aerobic              | 1     |
| DR72-2            | 20171210      | <i>Leifsonia shinsuensis</i>          | Pos        | 2468      | 100%              | 99%   | Human dental plaque | Aerobic              | 1     |
| DR96-3            | 20171213      | <i>Leifsonia shinsuensis</i>          | Pos        | 2494      | 100%              | 99%   | Human dental plaque | Aerobic              | 1     |

|         |          |                                           |     |      |      |      |                     |         |   |
|---------|----------|-------------------------------------------|-----|------|------|------|---------------------|---------|---|
| DR96-4  | 20171213 | <i>Leifsonia shinsuensis</i>              | Pos | 2475 | 100% | 99%  | Human dental plaque | Aerobic | 1 |
| DR-15   | 20171115 | <i>Leuconostoc citreum</i>                | Pos | 1716 | 99%  | 99%  | Human dental plaque | Aerobic | 1 |
| 53-2    | 20181210 | <i>Leuconostoc citreum</i>                | Pos | 1650 | 100  | 98   | Human dental plaque | Aerobic | 2 |
| 23      | 20181210 | <i>Leuconostoc citreum</i>                | Pos | 1653 | 100  | 98   | Human dental plaque | Aerobic | 2 |
| 53-1    | 20181210 | <i>Leuconostoc citreum</i>                | Pos | 2542 | 100  | 99   | Human dental plaque | Aerobic | 2 |
| DR65-1  | 20171210 | <i>Leuconostoc lactis</i>                 | Pos | 2571 | 100% | 99%  | Human dental plaque | Aerobic | 1 |
| DR75    | 20171210 | <i>Leuconostoc lactis</i>                 | Pos | 2558 | 100% | 99%  | Human dental plaque | Aerobic | 1 |
| DR53-2  | 20171202 | <i>Microbacterium aurum</i>               | Pos | 1546 | 98%  | 99%  | Human dental plaque | Aerobic | 1 |
| DR65-2  | 20171210 | <i>Microbacterium aurum</i>               | Pos | 1688 | 98%  | 99%  | Human dental plaque | Aerobic | 1 |
| DR65-3  | 20171210 | <i>Microbacterium aurum</i>               | Pos | 2505 | 100% | 99%  | Human dental plaque | Aerobic | 1 |
| DR65-4  | 20171210 | <i>Microbacterium aurum</i>               | Pos | 1441 | 96%  | 91%  | Human dental plaque | Aerobic | 1 |
| DR95-4  | 20171213 | <i>Microbacterium aurum</i>               | Pos | 1729 | 99%  | 99%  | Human dental plaque | Aerobic | 1 |
| B       | 20181210 | <i>Microbacterium aurum</i>               | Pos | 1637 | 98   | 97   | Human dental plaque | Aerobic | 2 |
| DR68    | 20171210 | <i>Microbacterium lacticum</i>            | Pos | 2490 | 100% | 100% | Human dental plaque | Aerobic | 1 |
| DR42-4  | 20171202 | <i>Microbacterium neimengense</i>         | Pos | 2494 | 100% | 99%  | Human dental plaque | Aerobic | 1 |
| DR92-4  | 20171213 | <i>Microbacterium neimengense</i>         | Pos | 2490 | 100% | 99%  | Human dental plaque | Aerobic | 1 |
| DR67-2  | 20171210 | <i>Microbacterium paraoxydans</i>         | Pos | 2495 | 100% | 100% | Human dental plaque | Aerobic | 1 |
| DR73-2  | 20171210 | <i>Microbacterium resistens</i>           | Pos | 2499 | 100% | 99%  | Human dental plaque | Aerobic | 1 |
| DR73-3  | 20171210 | <i>Microbacterium resistens</i>           | Pos | 2505 | 100% | 99%  | Human dental plaque | Aerobic | 1 |
| DR106-1 | 20171218 | <i>Microbacterium resistens</i>           | Pos | 2508 | 100% | 100% | Human dental plaque | Aerobic | 1 |
| DR106-2 | 20171218 | <i>Microbacterium resistens</i>           | Pos | 2505 | 99%  | 99%  | Human dental plaque | Aerobic | 1 |
| DR-19   | 20171115 | <i>Microbacterium sp</i>                  | Pos | 1434 | 97%  | 97%  | Human dental plaque | Aerobic | 1 |
| DR-27   | 20171115 | <i>Microbacterium sp</i>                  | Pos | 1735 | 99%  | 99%  | Human dental plaque | Aerobic | 1 |
| DR96-1  | 20171213 | <i>Microbacterium sp</i>                  | Pos | 1511 | 98%  | 99%  | Human dental plaque | Aerobic | 1 |
| DR102   | 20171218 | <i>Microbacterium sp</i>                  | Pos | 2518 | 100% | 100% | Human dental plaque | Aerobic | 1 |
| DR72-1  | 20171210 | <i>Microbacterium testaceum</i>           | Pos | 2471 | 100% | 99%  | Human dental plaque | Aerobic | 1 |
| 52-1    | 20181210 | <i>Microbacterium trichotecenolyticum</i> | Pos | 1722 | 100  | 99   | Human dental plaque | Aerobic | 2 |
| DR62    | 20171210 | <i>Nocardia farcinica</i>                 | Pos | 2495 | 99%  | 99%  | Human dental plaque | Aerobic | 1 |
| 45-2    | 20181210 | <i>Nocardia farcinica</i>                 | Pos | 1633 | 98   | 98   | Human dental plaque | Aerobic | 2 |
| DR85-2  | 20171213 | <i>Pediococcus pentosaceus</i>            | Pos | 2597 | 99%  | 99%  | Human dental plaque | Aerobic | 1 |
| DR-13   | 20171115 | <i>Pseudomonas sp.</i>                    | Neg | 2345 | 95%  | 96%  | Human dental plaque | Aerobic | 1 |
| DR-20   | 20171115 | <i>Pseudomonas sp.</i>                    | Neg | 2245 | 99%  | 100% | Human dental plaque | Aerobic | 1 |
| DR-23   | 20171115 | <i>Pseudomonas sp.</i>                    | Neg | 2413 | 96%  | 95%  | Human dental plaque | Aerobic | 1 |
| DR96-2  | 20171213 | <i>Roseomonas gilardii</i>                | Neg | 2436 | 100% | 99%  | Human dental plaque | Aerobic | 1 |
| DR36-3  | 20171202 | <i>Rothia mucilaginosa</i>                | Pos | 2449 | 100% | 99%  | Human dental plaque | Aerobic | 1 |
| DR36-4  | 20171202 | <i>Rothia mucilaginosa</i>                | Pos | 2507 | 100% | 99%  | Human dental plaque | Aerobic | 1 |
| DR42-1  | 20171202 | <i>Rothia mucilaginosa</i>                | Pos | 2468 | 100% | 99%  | Human dental plaque | Aerobic | 1 |
| DR42-2  | 20171202 | <i>Rothia mucilaginosa</i>                | Pos | 2444 | 100% | 99%  | Human dental plaque | Aerobic | 1 |
| DR46-2  | 20171202 | <i>Rothia mucilaginosa</i>                | Pos | 1729 | 99%  | 99%  | Human dental plaque | Aerobic | 1 |
| DR58-1  | 20171202 | <i>Rothia mucilaginosa</i>                | Pos | 2470 | 99%  | 99%  | Human dental plaque | Aerobic | 1 |
| DR63-2  | 20171210 | <i>Rothia mucilaginosa</i>                | Pos | 1736 | 99%  | 99%  | Human dental plaque | Aerobic | 1 |
| DR64-1  | 20171210 | <i>Rothia mucilaginosa</i>                | Pos | 1445 | 96%  | 98%  | Human dental plaque | Aerobic | 1 |
| DR64-2  | 20171210 | <i>Rothia mucilaginosa</i>                | Pos | 1733 | 99%  | 99%  | Human dental plaque | Aerobic | 1 |
| DR64-3  | 20171210 | <i>Rothia mucilaginosa</i>                | Pos | 1722 | 99%  | 99%  | Human dental plaque | Aerobic | 1 |
| DR76    | 20171210 | <i>Rothia mucilaginosa</i>                | Pos | 1725 | 99%  | 99%  | Human dental plaque | Aerobic | 1 |
| DR77-2  | 20171210 | <i>Rothia mucilaginosa</i>                | Pos | 1722 | 99%  | 99%  | Human dental plaque | Aerobic | 1 |
| DR86    | 20171213 | <i>Rothia mucilaginosa</i>                | Pos | 2479 | 100% | 99%  | Human dental plaque | Aerobic | 1 |
| DR87-4  | 20171213 | <i>Rothia mucilaginosa</i>                | Pos | 2455 | 100% | 99%  | Human dental plaque | Aerobic | 1 |
| DR88    | 20171213 | <i>Rothia mucilaginosa</i>                | Pos | 2505 | 100% | 99%  | Human dental plaque | Aerobic | 1 |
| DR90    | 20171213 | <i>Rothia mucilaginosa</i>                | Pos | 1731 | 99%  | 99%  | Human dental plaque | Aerobic | 1 |
| DR92-3  | 20171213 | <i>Rothia mucilaginosa</i>                | Pos | 1735 | 99%  | 99%  | Human dental plaque | Aerobic | 1 |
| DR94    | 20171213 | <i>Rothia mucilaginosa</i>                | Pos | 1317 | 94%  | 95%  | Human dental plaque | Aerobic | 1 |
| 9-2     | 20181210 | <i>Rothia mucilaginosa</i>                | Pos | 1711 | 100  | 99   | Human dental plaque | Aerobic | 2 |
| 9-3     | 20181210 | <i>Rothia mucilaginosa</i>                | Pos | 1637 | 98   | 98   | Human dental plaque | Aerobic | 2 |
| 15-1    | 20181210 | <i>Rothia mucilaginosa</i>                | Pos | 1701 | 100  | 99   | Human dental plaque | Aerobic | 2 |
| 18      | 20181210 | <i>Rothia mucilaginosa</i>                | Pos | 2486 | 100  | 99   | Human dental plaque | Aerobic | 2 |
| 59-1    | 20181210 | <i>Rothia mucilaginosa</i>                | Pos | 1703 | 99   | 99   | Human dental plaque | Aerobic | 2 |
| 59-2    | 20181210 | <i>Rothia mucilaginosa</i>                | Pos | 1714 | 99   | 99   | Human dental plaque | Aerobic | 2 |
| 61-1    | 20181210 | <i>Rothia mucilaginosa</i>                | Pos | 1711 | 100  | 99   | Human dental plaque | Aerobic | 2 |
| DR41-2  | 20171202 | <i>Staphylococcus epidermidis</i>         | Pos | 1733 | 99%  | 100% | Human dental plaque | Aerobic | 1 |
| DR41-3  | 20171202 | <i>Staphylococcus epidermidis</i>         | Pos | 1722 | 99%  | 99%  | Human dental plaque | Aerobic | 1 |
| DR49    | 20171202 | <i>Staphylococcus epidermidis</i>         | Pos | 1738 | 99%  | 99%  | Human dental plaque | Aerobic | 1 |
| DR50-1  | 20171202 | <i>Staphylococcus epidermidis</i>         | Pos | 1731 | 99%  | 99%  | Human dental plaque | Aerobic | 1 |
| DR50-2  | 20171202 | <i>Staphylococcus epidermidis</i>         | Pos | 1731 | 99%  | 99%  | Human dental plaque | Aerobic | 1 |
| DR54-1  | 20171202 | <i>Staphylococcus epidermidis</i>         | Pos | 1463 | 99%  | 98%  | Human dental plaque | Aerobic | 1 |
| DR54-2  | 20171202 | <i>Staphylococcus epidermidis</i>         | Pos | 1522 | 98%  | 99%  | Human dental plaque | Aerobic | 1 |
| DR60-1  | 20171210 | <i>Staphylococcus epidermidis</i>         | Pos | 1461 | 99%  | 97%  | Human dental plaque | Aerobic | 1 |
| DR60-2  | 20171210 | <i>Staphylococcus epidermidis</i>         | Pos | 1509 | 98%  | 99%  | Human dental plaque | Aerobic | 1 |
| DR61-2  | 20171210 | <i>Staphylococcus epidermidis</i>         | Pos | 2627 | 99%  | 100% | Human dental plaque | Aerobic | 1 |
| DR63-1  | 20171210 | <i>Staphylococcus epidermidis</i>         | Pos | 1712 | 99%  | 99%  | Human dental plaque | Aerobic | 1 |
| DR66    | 20171210 | <i>Staphylococcus epidermidis</i>         | Pos | 1465 | 99%  | 98%  | Human dental plaque | Aerobic | 1 |
| DR74-3  | 20171210 | <i>Staphylococcus epidermidis</i>         | Pos | 1489 | 99%  | 98%  | Human dental plaque | Aerobic | 1 |
| DR74-4  | 20171210 | <i>Staphylococcus epidermidis</i>         | Pos | 1480 | 99%  | 98%  | Human dental plaque | Aerobic | 1 |
| DR77-1  | 20171210 | <i>Staphylococcus epidermidis</i>         | Pos | 1482 | 99%  | 98%  | Human dental plaque | Aerobic | 1 |
| DR77-3  | 20171210 | <i>Staphylococcus epidermidis</i>         | Pos | 1500 | 99%  | 98%  | Human dental plaque | Aerobic | 1 |
| DR80    | 20171210 | <i>Staphylococcus epidermidis</i>         | Pos | 1718 | 99%  | 99%  | Human dental plaque | Aerobic | 1 |
| DR82-4  | 20171213 | <i>Staphylococcus epidermidis</i>         | Pos | 1439 | 99%  | 97%  | Human dental plaque | Aerobic | 1 |
| DR84-1  | 20171213 | <i>Staphylococcus epidermidis</i>         | Pos | 2555 | 100% | 100% | Human dental plaque | Aerobic | 1 |
| DR84-2  | 20171213 | <i>Staphylococcus epidermidis</i>         | Pos | 2560 | 100% | 99%  | Human dental plaque | Aerobic | 1 |
| DR85-1  | 20171213 | <i>Staphylococcus epidermidis</i>         | Pos | 2526 | 100% | 100% | Human dental plaque | Aerobic | 1 |
| DR89-2  | 20171213 | <i>Staphylococcus epidermidis</i>         | Pos | 2555 | 100% | 100% | Human dental plaque | Aerobic | 1 |
| DR89-4  | 20171213 | <i>Staphylococcus epidermidis</i>         | Pos | 2577 | 100% | 99%  | Human dental plaque | Aerobic | 1 |
| DR91-1  | 20171213 | <i>Staphylococcus epidermidis</i>         | Pos | 1517 | 99%  | 98%  | Human dental plaque | Aerobic | 1 |
| DR91-2  | 20171213 | <i>Staphylococcus epidermidis</i>         | Pos | 1543 | 99%  | 99%  | Human dental plaque | Aerobic | 1 |
| DR93-1  | 20171213 | <i>Staphylococcus epidermidis</i>         | Pos | 1504 | 99%  | 99%  | Human dental plaque | Aerobic | 1 |
| DR93-2  | 20171213 | <i>Staphylococcus epidermidis</i>         | Pos | 1537 | 98%  | 99%  | Human dental plaque | Aerobic | 1 |
| 24-1    | 20181210 | <i>Staphylococcus epidermidis</i>         | Pos | 1166 | 97   | 99   | Human dental plaque | Aerobic | 2 |
| 1-1     | 20181210 | <i>Staphylococcus epidermidis</i>         | Pos | 1692 | 99   | 99   | Human dental plaque | Aerobic | 2 |
| 1-4     | 20181210 | <i>Staphylococcus epidermidis</i>         | Pos | 1712 | 100  | 99   | Human dental plaque | Aerobic | 2 |
| 3-1     | 20181210 | <i>Staphylococcus epidermidis</i>         | Pos | 1720 | 100  | 99   | Human dental plaque | Aerobic | 2 |
| 3-2     | 20181210 | <i>Staphylococcus epidermidis</i>         | Pos | 1729 | 100  | 99   | Human dental plaque | Aerobic | 2 |
| 4-4-1   | 20181210 | <i>Staphylococcus epidermidis</i>         | Pos | 1727 | 100  | 99   | Human dental plaque | Aerobic | 2 |
| 4-5     | 20181210 | <i>Staphylococcus epidermidis</i>         | Pos | 1696 | 99   | 99   | Human dental plaque | Aerobic | 2 |

|        |          |                                       |     |      |      |      |                     |         |   |
|--------|----------|---------------------------------------|-----|------|------|------|---------------------|---------|---|
| 20     | 20181210 | <i>Staphylococcus epidermidis</i>     | Pos | 1709 | 99   | 99   | Human dental plaque | Aerobic | 2 |
| 4-4-2  | 20181210 | <i>Staphylococcus haemolyticus</i>    | Pos | 1716 | 100  | 99   | Human dental plaque | Aerobic | 2 |
| 5-3    | 20181210 | <i>Staphylococcus haemolyticus</i>    | Pos | 1701 | 100  | 99   | Human dental plaque | Aerobic | 2 |
| 5-5    | 20181210 | <i>Staphylococcus haemolyticus</i>    | Pos | 1666 | 99   | 99   | Human dental plaque | Aerobic | 2 |
| DR91-3 | 20171213 | <i>Staphylococcus saprophyticus</i>   | Pos | 1738 | 99%  | 99%  | Human dental plaque | Aerobic | 1 |
| DR97-1 | 20171213 | <i>Staphylococcus saprophyticus</i>   | Pos | 2488 | 100% | 100% | Human dental plaque | Aerobic | 1 |
| DR89-5 | 20171213 | <i>Staphylococcus saprophyticus</i>   | Pos | 2564 | 100% | 99%  | Human dental plaque | Aerobic | 1 |
| DR89-6 | 20171213 | <i>Staphylococcus saprophyticus</i>   | Pos | 2564 | 100% | 99%  | Human dental plaque | Aerobic | 1 |
| DR92-1 | 20171213 | <i>Staphylococcus saprophyticus</i>   | Pos | 2555 | 100% | 100% | Human dental plaque | Aerobic | 1 |
| DR92-2 | 20171213 | <i>Staphylococcus saprophyticus</i>   | Pos | 2555 | 100% | 100% | Human dental plaque | Aerobic | 1 |
| DR97-2 | 20171213 | <i>Staphylococcus saprophyticus</i>   | Pos | 1317 | 98%  | 95%  | Human dental plaque | Aerobic | 1 |
| DR-1   | 20171101 | <i>Stenotrophomonas maltophilia</i>   | Neg | 1709 | 99%  | 99%  | Human dental plaque | Aerobic | 1 |
| DR-3   | 20171101 | <i>Stenotrophomonas maltophilia</i>   | Neg | 1738 | 99%  | 100% | Human dental plaque | Aerobic | 1 |
| DR-4   | 20171101 | <i>Stenotrophomonas maltophilia</i>   | Neg | 2516 | 100% | 99%  | Human dental plaque | Aerobic | 1 |
| DR-5   | 20171101 | <i>Stenotrophomonas maltophilia</i>   | Neg | 1725 | 99%  | 99%  | Human dental plaque | Aerobic | 1 |
| DR-6   | 20171030 | <i>Stenotrophomonas maltophilia</i>   | Neg | 1729 | 99%  | 99%  | Human dental plaque | Aerobic | 1 |
| DR73-1 | 20171210 | <i>Stenotrophomonas maltophilia</i>   | Neg | 2498 | 100% | 99%  | Human dental plaque | Aerobic | 1 |
| DR73-4 | 20171210 | <i>Stenotrophomonas maltophilia</i>   | Neg | 1522 | 99%  | 99%  | Human dental plaque | Aerobic | 1 |
| DR99   | 20171218 | <i>Stenotrophomonas maltophilia</i>   | Neg | 2505 | 99%  | 99%  | Human dental plaque | Aerobic | 1 |
| DR-28  | 20171115 | <i>Stenotrophomonas maltophilia</i>   | Neg | 1709 | 99%  | 99%  | Human dental plaque | Aerobic | 1 |
| DR-29  | 20171115 | <i>Stenotrophomonas maltophilia</i>   | Neg | 1738 | 99%  | 99%  | Human dental plaque | Aerobic | 1 |
| DR-33  | 20171115 | <i>Stenotrophomonas maltophilia</i>   | Neg | 2516 | 99%  | 99%  | Human dental plaque | Aerobic | 1 |
| DR-34  | 20171115 | <i>Stenotrophomonas maltophilia</i>   | Neg | 1725 | 99%  | 100% | Human dental plaque | Aerobic | 1 |
| 5-1    | 20181210 | <i>Stenotrophomonas maltophilia</i>   | Neg | 1729 | 100  | 99   | Human dental plaque | Aerobic | 2 |
| 6-1    | 20181210 | <i>Stenotrophomonas maltophilia</i>   | Neg | 1712 | 99   | 99   | Human dental plaque | Aerobic | 2 |
| 8-2    | 20181210 | <i>Stenotrophomonas maltophilia</i>   | Neg | 1712 | 100  | 99   | Human dental plaque | Aerobic | 2 |
| 30-2   | 20181210 | <i>Stenotrophomonas maltophilia</i>   | Neg | 1742 | 100  | 99   | Human dental plaque | Aerobic | 2 |
| 38     | 20181210 | <i>Stenotrophomonas maltophilia</i>   | Neg | 1718 | 100  | 99   | Human dental plaque | Aerobic | 2 |
| 45-1   | 20181210 | <i>Stenotrophomonas maltophilia</i>   | Neg | 1716 | 99   | 99   | Human dental plaque | Aerobic | 2 |
| 48     | 20181210 | <i>Stenotrophomonas maltophilia</i>   | Neg | 1717 | 100  | 99   | Human dental plaque | Aerobic | 2 |
| D-1    | 20181210 | <i>Stenotrophomonas maltophilia</i>   | Neg | 1709 | 100  | 99   | Human dental plaque | Aerobic | 2 |
| DR36-1 | 20171202 | <i>Streptococcus mitis</i>            | Pos | 2514 | 100% | 99%  | Human dental plaque | Aerobic | 1 |
| DR37-1 | 20171202 | <i>Streptococcus mitis</i>            | Pos | 2462 | 100% | 99%  | Human dental plaque | Aerobic | 1 |
| DR37-2 | 20171202 | <i>Streptococcus mitis</i>            | Pos | 2475 | 100% | 99%  | Human dental plaque | Aerobic | 1 |
| DR37-3 | 20171202 | <i>Streptococcus mitis</i>            | Pos | 1696 | 99%  | 99%  | Human dental plaque | Aerobic | 1 |
| 56     | 20181210 | <i>Streptococcus mitis</i>            | Pos | 1712 | 99   | 99   | Human dental plaque | Aerobic | 2 |
| 55-1   | 20181210 | <i>Streptococcus parasanguinis</i>    | Pos | 1646 | 99   | 98   | Human dental plaque | Aerobic | 2 |
| DR55-1 | 20171202 | <i>Streptococcus pseudopneumoniae</i> | Pos | 2553 | 100% | 99%  | Human dental plaque | Aerobic | 1 |
| DR55-2 | 20171202 | <i>Streptococcus pseudopneumoniae</i> | Pos | 2555 | 100% | 99%  | Human dental plaque | Aerobic | 1 |
| DR67-4 | 20171210 | <i>Tsukamurella inchonensis</i>       | Pos | 2483 | 100% | 99%  | Human dental plaque | Aerobic | 1 |
| DR38-2 | 20171202 | <i>Weissella confusa</i>              | Pos | 2603 | 100% | 99%  | Human dental plaque | Aerobic | 1 |
| DR38-3 | 20171202 | <i>Weissella confusa</i>              | Pos | 2569 | 100% | 100% | Human dental plaque | Aerobic | 1 |
| DR79-1 | 20171210 | <i>Weissella confusa</i>              | Pos | 1208 | 95%  | 94%  | Human dental plaque | Aerobic | 1 |
